# Supplementary material for: Are the same factors determining biodiversity in cities across different regions? Comparing drivers of urban bird richness patterns in Southern Asia vs. Western Europe
Source: Springer Nature journal article supplement (doi:10.1007/s11252-023-01404-1), 2023-07-12
Supplement: MOESM1 [file 25760626]

## ELECTRONIC SUPPLEMENTARY MATERIAL

**ESM\_Table\_1:** A list of variables. The variables used as explanatory factors during the major statistical analysis are marked **bold**.

| Variables                           | Description                                                                                                                                                                                                                                                                                                    | Data type  | References                           |
|-------------------------------------|----------------------------------------------------------------------------------------------------------------------------------------------------------------------------------------------------------------------------------------------------------------------------------------------------------------|------------|--------------------------------------|
| <b>Impervious surface</b>           | Value 0-100 percentage of ‘Impervious surface’ from ‘Global Man-made Impervious Surface (GMIS) Dataset, resolution ~30m                                                                                                                                                                                        | Continuous | Brown et al. 2017                    |
| <b>Human population density</b>     | Value of average density of populations of the years 2000, 2010, 2020, from ‘Gridded Population of the World Version 4 (GPWv4)’ datasets, resolution ~1km                                                                                                                                                      | Continuous | CIESIN 2018                          |
| <b>Habitat Shannon metric</b>       | Value of ‘Diversity of EVI (Enhanced Vegetation Index)’, from Global Habitat Heterogeneity dataset, resolution ~ 30 arc-second                                                                                                                                                                                 | Continuous | Tuanmu and Jetz 2015                 |
| <b>Green area</b>                   | Total area of green habitat patches at the grid cells (m <sup>2</sup> ). Value considered the area of urban parks, gardens, cemetery, forest, nature-reserves at the grid cells unit. Value is extracted using OpenStreetMap-Shapefiles in ArcMap.                                                             | Continuous | OpenStreetMap 2021                   |
| <b>Inland waterbody area</b>        | Total area with waterbody at the grid cells (m <sup>2</sup> ). Value considered the area of any waterbodies at the grid cells unit. Value is extracted using OpenStreetMap-Shapefiles in ArcMap                                                                                                                |            | OpenStreetMap 2021                   |
| <b>Agricultural area</b>            | Value of cropland percent. Value ranges between 0 and 1. 0 means zero percent of pixel area under cropland present and 1 means 100% of the pixel area under cropland.                                                                                                                                          | Continuous | Ramankutty et al. 2010               |
| Vegetation                          | Value 1-100 % describes average annual maximum green vegetation fraction (MGVF), and are based on 12 years (2001-2012) of Collection 5 MOD13A2 normalized difference vegetation index (NDVI) data. Values range from 0 (corresponding to 0% vegetation cover) to 100 (corresponding to 100% vegetation cover). | Continuous | Broxton et al. 2014                  |
| <b>Distance to inland waterbody</b> | The value represents the distance (in kilometres) from grid cell centre to the nearest inland waterbody for the year 2000-2012, at a resolution of 3 arc (approximately 100m at the equator).                                                                                                                  | Continuous | WorldPop 2018a; Lamarche et al. 2017 |
| <b>Distance to green area</b>       | Distance (km) from grid cell centroids to the nearest edge of green area. Value                                                                                                                                                                                                                                | Continuous | OpenStreetMap 2021                   |

| Variables                                      | Description                                                                                                                                                                                                                                                 | Data type   | References                       |
|------------------------------------------------|-------------------------------------------------------------------------------------------------------------------------------------------------------------------------------------------------------------------------------------------------------------|-------------|----------------------------------|
| <b>Distance to agricultural area</b>           | measured using OpenStreetMap-Shapefiles in ArcMap<br>Distance (km) from grid cell centroids to the nearest edge of agricultural area (i.e., includes cropland, farmland, orchard).<br>Value extracted using OpenStreetMap-Shapefiles in ArcMap              | Continuous  | OpenStreetMap 2021               |
| Distance to nature reserve and wilderness area | The distance to IUCN strict nature reserve and wilderness area edges.<br>resolution of 3 arc (approximately 100m at the equator). The values of the raster are the distance (in kilometres) from the cell centre to the nearest feature for the year 2010.  | Continuous  | WorldPop 2018b                   |
| Distance to coast                              | Distance (km) from grid centroids to the Ocean coastline. Value extracted using OpenStreetMap-Shapefiles in ArcMap.                                                                                                                                         | Continuous  | Nature Earth 2021                |
| Presence of cropland                           | Value 20, Mosaic cropland (50-70%) / vegetation (grassland/shrubland/forest) (20-50%), GLOBCOVER dataset, resolution ~300m                                                                                                                                  | Categorical | ESA 2009; Arino et al. 2008      |
| Presence of forest area                        | Value 110, mosaic forest or shrubland (50-70%) / grassland (20-50%), 'GLOBCOVER' dataset, resolution ~300m                                                                                                                                                  | Categorical | ESA 2009; Arino et al. 2008      |
| Human Development Index                        | Gridded global datasets for Gross Domestic Product and Human Development Index (HDI) over 1990–2015. Gridded HDI, derived from a combination of sub-national and national datasets, at a resolution of approximate 5 arc-min (around 10 km at the equator). | Continuous  | Kummu et al. 2017                |
| Purchasing Power Parity                        | Value of purchasing power parity in constant 2011 International US dollars, at 30 arc-sec resolution, multiplied by gridded population data GHS.                                                                                                            | Continuous  | Kummu et al. 2017                |
| <b>Temperature</b>                             | Bio-1: Average annual temperature, WorldClim dataset, resolution ~1km                                                                                                                                                                                       | Continuous  | Fick and Hijmans 2017            |
| <b>Precipitation</b>                           | Bio-12: Average annual precipitation, WorldClim dataset, resolution ~1km                                                                                                                                                                                    | Continuous  | Fick and Hijmans 2017            |
| Elevation                                      | The value of each grid cell represents its elevation above the sea level (in meters).                                                                                                                                                                       | Continuous  | de Ferranti 2017; WorldPop 2018c |
| Slope                                          | The value of each grid cell represents its topographic slope (in degree).                                                                                                                                                                                   | Continuous  | de Ferranti 2017; WorldPop 2018d |

## References

- Arino O. et al (2008) The most detailed portrait of Earth. *European Space Agency* 136:25-31
- Brown de Colstoun EC et al (2017) Global Man-made Impervious Surface (GMIS) Dataset from Landsat. Palisades, NY: NASA Socioeconomic Data and Applications Center (SEDAC). Accessed 10 May 2008. doi: <https://doi.org/10.7927/H4P55KKE>
- Broxton PD et al (2014) A MODIS-Based 1 km Maximum Green Vegetation Fraction Dataset. *J. Appl. Meteorol. Clim.* doi: <http://dx.doi.org/10.1175/JAMC-D-13-0356.1>
- CIESIN (Center for International Earth Science Information Network - Columbia University) (2018) Documentation for the Gridded Population of the World, Version 4 (GPWv4), Revision 11 Data Sets. Palisades NY: NASA Socioeconomic Data and Applications Center (SEDAC). <https://doi.org/10.7927/H45Q4T5F>
- de Ferranti J (2017) 'Digital Elevation Data'. Viewfinder Panoramas ([www.viewfinderPanoramas.org/dem3.html](http://www.viewfinderPanoramas.org/dem3.html)); based on NASA's Shuttle Radar Topography Mission (SRTM) data (<http://www2.jpl.nasa.gov/srtm/>). doi: 10.5258/SOTON/WP00644
- ESA (2009) Global Land Cover Map (GlobCover 2009 Project). European Space Agency (ESA). Available at: [http://due.esrin.esa.int/page\\_globcover.php](http://due.esrin.esa.int/page_globcover.php)
- Fick SE and Hijmans RJ (2017) WorldClim 2: new 1-km spatial resolution climate surfaces for global land areas. *International journal of climatology* 37(12): 4302-4315
- Kummu M, Taka M and Guillaume JHA (2017) Dryad Digital Repository <https://doi.org/10.5061/dryad.dk1j0>. Accessed on 10.05.21
- Lamarche, C., Santoro, M., Bontemps, S., d'Andrimont, R., Radoux, J., Giustarini, L., Brockmann, C., Wevers, J., Defourny, P. and Arino, O (2017) 'Compilation and validation of SAR and optical data products for a complete and global map of inland/ocean water tailored to the climate modeling community'. *Remote Sensing*, 9(1), 36 (<https://doi.org/10.3390/rs9010036>) – ESA (European Space Agency) CCI (Climate Change Initiative) Land Cover project led by UCLouvain, 2017: Water Bodies v4.0 (<http://maps.elie.ucl.ac.be/CCI/viewer/>)
- Natural Earth (2021) Free vector and raster map data at [naturalearthdata.com](http://naturalearthdata.com). Accessed on 28.05.21. Available at: <https://www.naturalearthdata.com/downloads/10m-physical-vectors/10m-coastline/>
- OpenStreetMap (2021) OpenStreetMap-Shapefiles. Downloaded at, <https://www.geofabrik.de/>
- Ramankutty N et al (2010) Global Agricultural Lands: Croplands, 2000. Data distributed by the Socioeconomic Data and Applications Center (SEDAC). Accessed on 06.07.2021. Available at: <http://sedac.ciesin.columbia.edu/es/aglands.html>
- Tuanmu MN and Jetz W (2015) A global, remote sensing-based characterization of terrestrial habitat heterogeneity for biodiversity and ecosystem modelling. *Global Ecology and Biogeography*. doi: 10.1111/geb.12365
- WorldPop (2018a) Distance to ESA-CCI-LC inland water. WorldPop ([www.worldpop.org](http://www.worldpop.org) - School of Geography and Environmental Science, University of Southampton; Department of Geography and Geosciences, University of Louisville; Departement de Geographie, Universite de Namur) and Center for International Earth Science Information Network (CIESIN), Columbia University. Global High Resolution Population Denominators Project - Funded by The Bill and Melinda Gates Foundation (OPP1134076). Available at: <https://hub.worldpop.org/geodata/listing?id=61>
- WorldPop (2018b) Distance to IUCN strict nature reserve and wilderness area edges 2007-2017. WorldPop ([www.worldpop.org](http://www.worldpop.org) - School of Geography and Environmental Science, University of Southampton; Department of Geography and Geosciences, University of Louisville; Departement de Geographie, Universite de Namur) and Center for International Earth Science Information Network (CIESIN), Columbia University Global High Resolution Population Denominators Project - Funded by The Bill and Melinda Gates Foundation (OPP1134076). Available at: <https://hub.worldpop.org/geodata/listing?id=35>
- WorldPop (2018c) SRTM-based elevation per country. WorldPop ([www.worldpop.org](http://www.worldpop.org) - School of Geography and Environmental Science, University of Southampton; Department of Geography and Geosciences, University of Louisville; Departement de Geographie, Universite de Namur) and Center for International Earth Science Information Network (CIESIN), Columbia University

Global High Resolution Population Denominators Project - Funded by The Bill and Melinda Gates Foundation (OPP1134076). Available at: <https://hub.worldpop.org/geodata/listing?id=58>  
WorldPop (2018d) SRTM-based slope per country. WorldPop ([www.worldpop.org](http://www.worldpop.org) - School of Geography and Environmental Science, University of Southampton; Department of Geography and Geosciences, University of Louisville; Departement de Geographie, Universite de Namur) and Center for International Earth Science Information Network (CIESIN), Columbia University.  
Global High Resolution Population Denominators Project - Funded by The Bill and Melinda Gates Foundation (OPP1134076). Available at: <https://hub.worldpop.org/geodata/listing?id=57>
